# Supplementary material
Source: PubMed Central journal article supplement (PMC5359684)
Supplement: Supp_Table1.pdf [file Supp_Table1.pdf]

## Supplementary Data

### Supplementary Table S1. List of Systemic Comorbidities

Operation to bypass or unclog the arteries in their legs

Difficulty moving an arm or a leg

Toe, foot, or leg amputation

Pain or numbness in a toe, foot, or leg

Pacemaker placement

Dialysis treatment

Heart disease

Cancer

AIDS

COPD

Peripheral vascular disease

Liver disease

Ulcer disease

Connective tissue disease

Dementia

Kidney problems
