# Supplementary material
Source: PubMed Central journal article supplement (PMC5359684)
Supplement: Supp_Table2.pdf [file Supp_Table2.pdf]

**Supplementary Table S2. Access to Care Scale**

| ACCESS TO CARE ITEMS                                                  | STRONGLY AGREE | SOMEWHAT AGREE | UNCERTAIN | SOMEWHAT DISAGREE | STRONGLY DISAGREE |
|-----------------------------------------------------------------------|----------------|----------------|-----------|-------------------|-------------------|
| If I need hospital care, I can get admitted without any trouble.      | 5              | 4              | 3         | 2                 | 1                 |
| I am able to get medical care whenever I need it.                     | 5              | 4              | 3         | 2                 | 1                 |
| Places where I can get medical care are very conveniently located.    | 5              | 4              | 3         | 2                 | 1                 |
| If I have a medical question, I can reach a doctor or nurse for help. | 5              | 4              | 3         | 2                 | 1                 |
| I have easy access to the medical specialists I need.                 | 5              | 4              | 3         | 2                 | 1                 |
